# Supplementary figures and images for: Micropaleontological and Isotopic Perspective of Surface Water Mass Variability in the NE Atlantic from MIS 6 to 5e (188 to 115 ka)
Source: MDPI journal article supplement (doi:10.3390/geosciences13050149), 2023-05-15

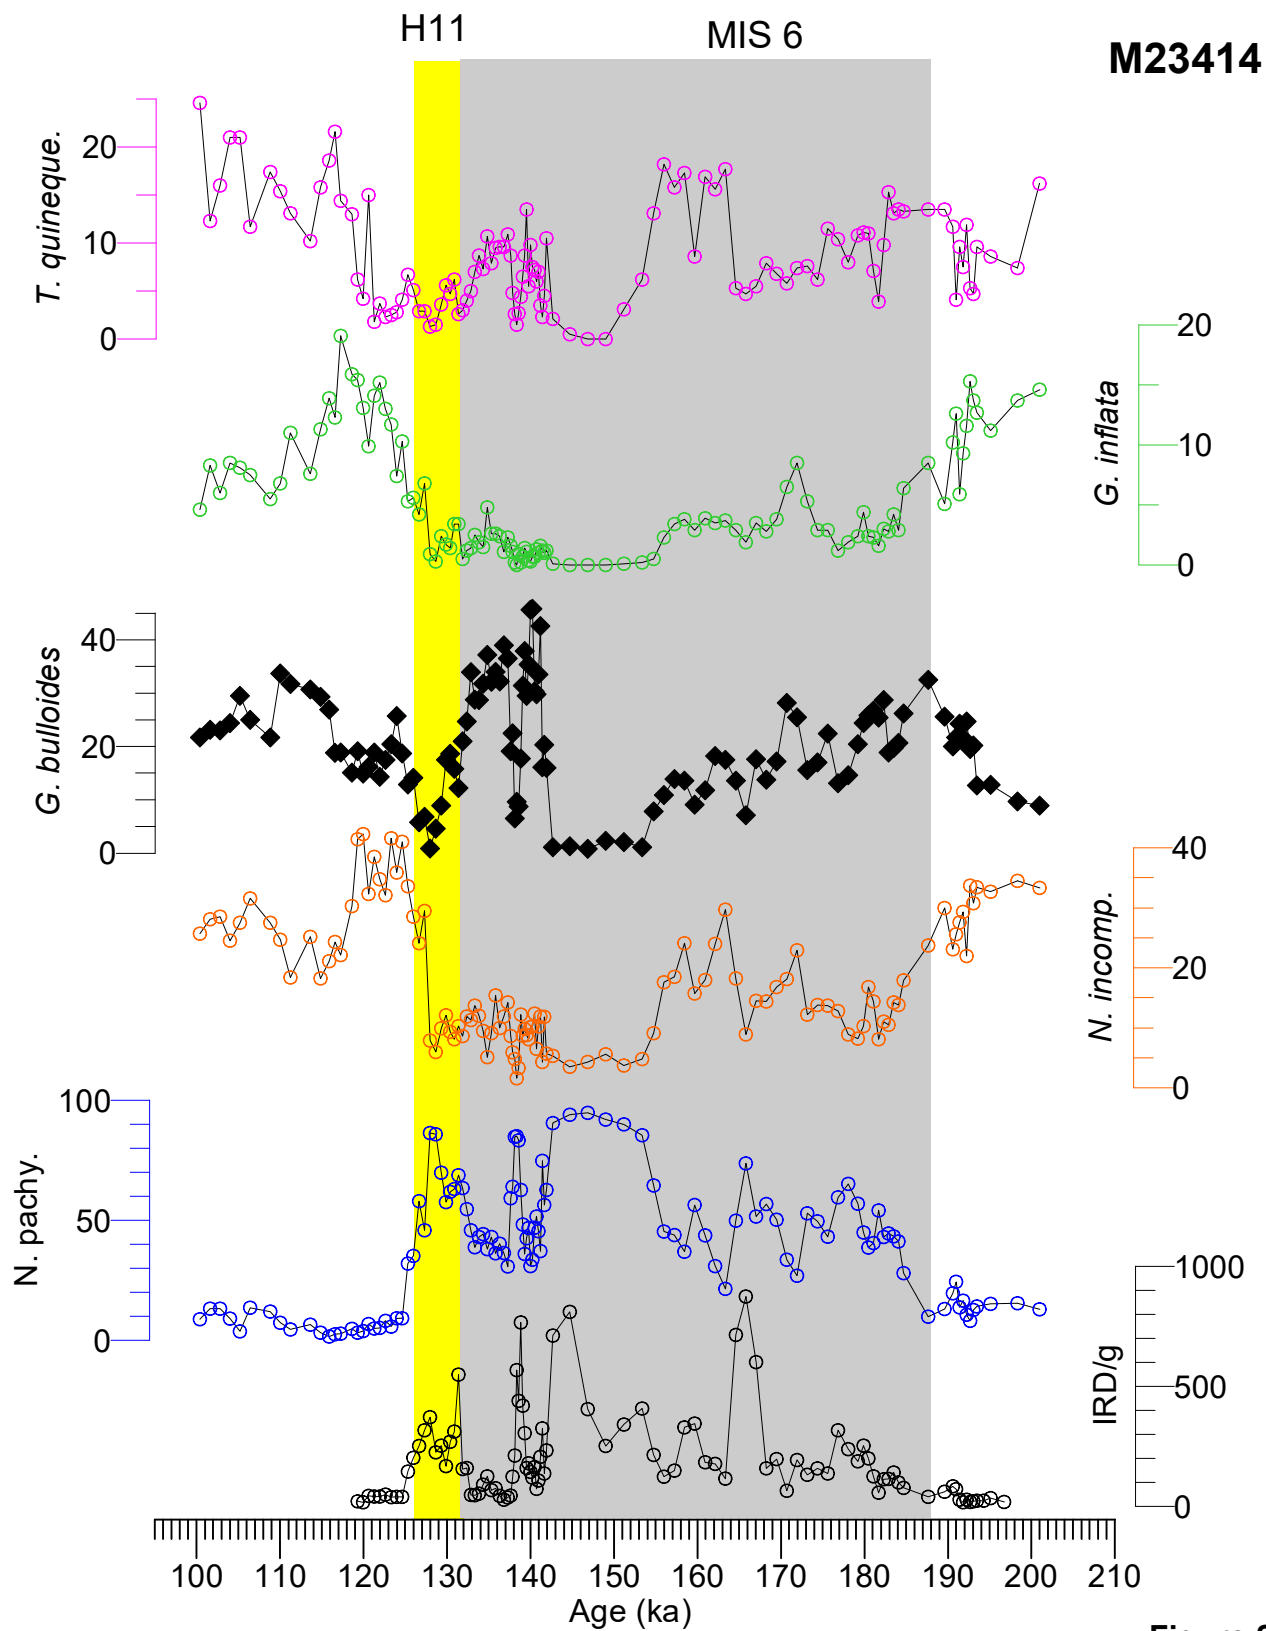

**Figure S1**  
**Rashid et al. (2023)**

Supplement: s1 [file s1]
